# Supplementary material for: An empirical study on the development of metaphorical comprehension of Chinese children
Source: Frontiers journal article supplement (doi:10.3389/fpsyg.2023.1254129), 2024-01-08
Supplement: Data_Sheet_1.pdf [file Data_Sheet_1.pdf]

## Supplementary File in Chinese

### 1. Experimental material

---

| display1 | display2 | display3 |
|----------|----------|----------|
| 思念       | 是        | 潮水       |
| 梦想       | 是        | 翅膀       |
| 草坪       | 是        | 地毯       |
| 大树       | 是        | 空调       |
| 海洋       | 是        | 麦田       |
| 云朵       | 是        | 棉花       |
| 太阳       | 是        | 皮球       |
| 小脸       | 是        | 苹果       |
| 生活       | 是        | 舞台       |
| 荷叶       | 是        | 小伞       |
| 星星       | 是        | 眼睛       |
| 雨水       | 是        | 眼泪       |
| 智慧       | 是        | 钥匙       |
| 爸爸       | 是        | 超人       |
| 眼睛       | 是        | 窗户       |
| 困难       | 是        | 敌人       |
| 彩虹       | 是        | 拱桥       |
| 儿童       | 是        | 花朵       |
| 祖国       | 是        | 花园       |
| 时间       | 是        | 金钱       |
| 书籍       | 是        | 朋友       |
| 孩子       | 是        | 小苗       |
| 学校       | 是        | 摇篮       |
| 迪迦       | 是        | 英雄       |
| 老师       | 是        | 园丁       |
| 警察       | 是        | 保护       |
| 孝顺       | 是        | 传统       |
| 发明       | 是        | 创造       |
| 劳动       | 是        | 光荣       |
| 运动       | 是        | 健康       |
| 成长       | 是        | 快乐       |
| 问候       | 是        | 礼貌       |
| 团队       | 是        | 力量       |
| 诚实       | 是        | 美德       |
| 分享       | 是        | 善良       |
| 学生       | 是        | 未来       |
| 家庭       | 是        | 温暖       |
| 蔬菜       | 是        | 营养       |
| 小狗       | 是        | 动物       |
| 电脑       | 是        | 工具       |
| 教师       | 是        | 职业       |

---

|    |   |    |
|----|---|----|
| 宝宝 | 是 | 孩子 |
| 唐僧 | 是 | 和尚 |
| 长江 | 是 | 河流 |
| 妈妈 | 是 | 女性 |
| 大脑 | 是 | 器官 |
| 白菜 | 是 | 蔬菜 |
| 西瓜 | 是 | 水果 |
| 积木 | 是 | 玩具 |
| 嫦娥 | 是 | 仙女 |
| 花园 | 是 | 班级 |
| 大象 | 是 | 鼻子 |
| 米饭 | 是 | 蛋糕 |
| 电视 | 是 | 动画 |
| 小熊 | 是 | 公园 |
| 玩具 | 是 | 花朵 |
| 日历 | 是 | 报纸 |
| 桌子 | 是 | 钢笔 |
| 书本 | 是 | 泪水 |
| 大楼 | 是 | 鱼肉 |
| 皮球 | 是 | 气球 |
| 汽车 | 是 | 面包 |
| 家具 | 是 | 书本 |
| 苹果 | 是 | 果汁 |
| 瀑布 | 是 | 水杯 |
| 手机 | 是 | 夹子 |
| 学校 | 是 | 同学 |
| 茶叶 | 是 | 篮球 |
| 鸭子 | 是 | 香蕉 |
| 小羊 | 是 | 小草 |
| 蝴蝶 | 是 | 小河 |
| 青蛙 | 是 | 小鸟 |
| 镜子 | 是 | 心情 |
| 饺子 | 是 | 音乐 |
| 牛奶 | 是 | 饮料 |
| 小猫 | 是 | 春天 |

## 2.Practice material

| display1 | display2 | display3 |
|----------|----------|----------|
| 昨天       | 是        | 眼镜       |
| 白雪       | 是        | 白糖       |
| 人生       | 是        | 旅行       |
| 成功       | 是        | 光荣       |
| 松鼠       | 是        | 动物       |
| 天气       | 是        | 笔记       |

## Supplementary File in English

### Experimental material

| Display1     | Display2 | Display3        |
|--------------|----------|-----------------|
| Longing      | is       | tide            |
| Dream        | is       | wing            |
| Lawn         | is       | carpet          |
| Tree         | is       | air conditioner |
| Sea          | is       | cornfield       |
| Cloud        | is       | cotton          |
| Sun          | is       | ball            |
| Face         | is       | apple           |
| Life         | is       | stage           |
| Lotus leaf   | is       | umbrella        |
| Star         | is       | eye             |
| Rainwater    | is       | tear            |
| Wisdom       | is       | key             |
| Father       | is       | superman        |
| Eye          | is       | Window          |
| Difficulty   | is       | enemy           |
| Rainbow      | is       | arch            |
| Child        | is       | flower          |
| Motherland   | is       | garden          |
| Time         | is       | money           |
| Book         | is       | friend          |
| Kid          | is       | seedling        |
| School       | is       | cradle          |
| Tiga         | is       | hero            |
| Teacher      | is       | gardener        |
| Police       | is       | protection      |
| Filial piety | is       | tradition       |
| Invention    | is       | creation        |
| Work         | is       | glory           |
| Exercise     | is       | health          |
| Growth       | is       | joy             |
| Greeting     | is       | politeness      |
| Unity        | is       | power           |
| Honesty      | is       | virtue          |
| Sharing      | is       | kindness        |
| Student      | is       | future          |
| Family       | is       | warmth          |
| Vegetable    | is       | nutrition       |
| Dog          | is       | animal          |

|                 |     |            |
|-----------------|-----|------------|
| Computer        | is  | tool       |
| Teacher         | is  | 15         |
| Baby            | is  | kid        |
| Xuan Zang       | is  | monk       |
| Yangtze River   | is  | river      |
| Mother          | is  | woman      |
| Brain           | is  | organ      |
| Cabbage         | is  | vegetable  |
| Watermelon      | is  | fruit      |
| Building blocks | are | toys       |
| Chang'e         | is  | fairy      |
| Garden          | is  | class      |
| Elephant        | is  | nose       |
| Rice            | is  | cake       |
| Television      | is  | cartoon    |
| Bear            | is  | park       |
| Toy             | is  | flower     |
| Calendar        | is  | newspaper  |
| Table           | is  | pen        |
| Book            | is  | tear       |
| Building        | is  | fish       |
| Ball            | is  | balloon    |
| Car             | is  | bread      |
| Furniture       | is  | book       |
| Apple           | is  | juice      |
| Waterfall       | is  | cup        |
| Mobile phone    | is  | clip       |
| School          | is  | classmate  |
| Tea             | is  | basketball |
| Duck            | is  | banana     |
| Lamb            | is  | grass      |
| Butterfly       | is  | rivulet    |
| Frog            | is  | bird       |
| Mirror          | is  | mood       |
| Dumplings       | are | music      |
| Milk            | is  | beverage   |
| Kitten          | is  | spring     |

## 2. Practice material

| Display 1 | Display 2 | Display 3 |
|-----------|-----------|-----------|
| Yesterday | is        | glasses   |
| Snow      | is        | sugar     |
| Life      | is        | journey   |

---

|          |    |        |
|----------|----|--------|
| Success  | is | honor  |
| Squirrel | is | animal |
| Weather  | is | note   |

---
